# Supplementary material for: Retinoic acid enhances HIV-1 reverse transcription and transcription in macrophages via mTOR-modulated mechanisms
Source: PubMed Central journal article supplement — Cell Rep. Author manuscript; Available in PMC 2024 Aug 22. (PMC11341200; doi:10.1016/j.celrep.2024.114414), 2024-06-28
Supplement: NIHMS2011870-supplement-1.pdf [file NIHMS2011870-supplement-1.pdf]

**Cell Reports, Volume 43**

**Supplemental information**

**Retinoic acid enhances HIV-1 reverse  
transcription and transcription in macrophages  
via mTOR-modulated mechanisms**

**Jonathan Dias, Amélie Cattin, Maryam Bendoumou, Antoine Dutilleul, Robert Lodge, Jean-Philippe Goulet, Augustine Fert, Laurence Raymond Marchand, Tomas Raul Wiche Salinas, Christ-Dominique Ngassaki Yoka, Etienne Moreira Gabriel, Ramon Edwin Caballero, Jean-Pierre Routy, Eric A. Cohen, Carine Van Lint, and Petronela Ancuta**

**A**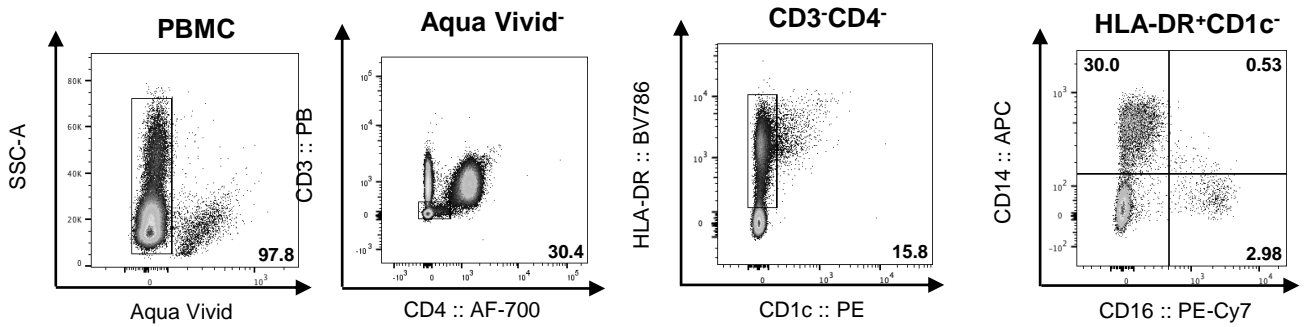**B**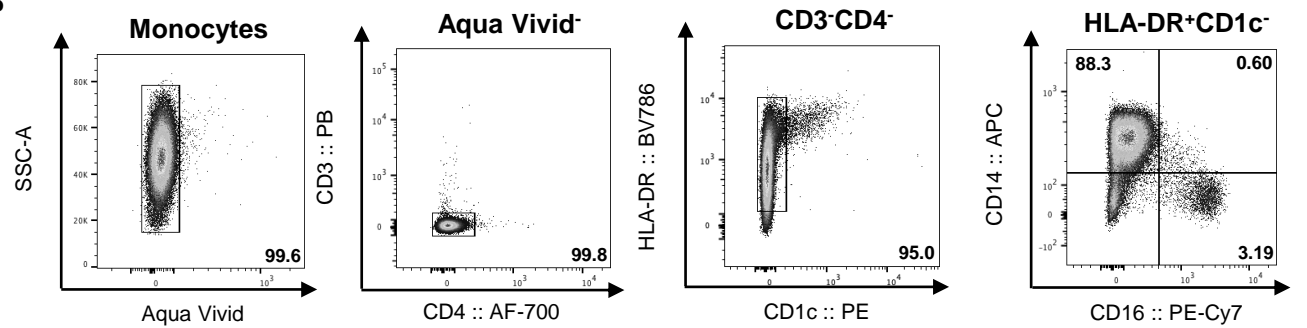**C**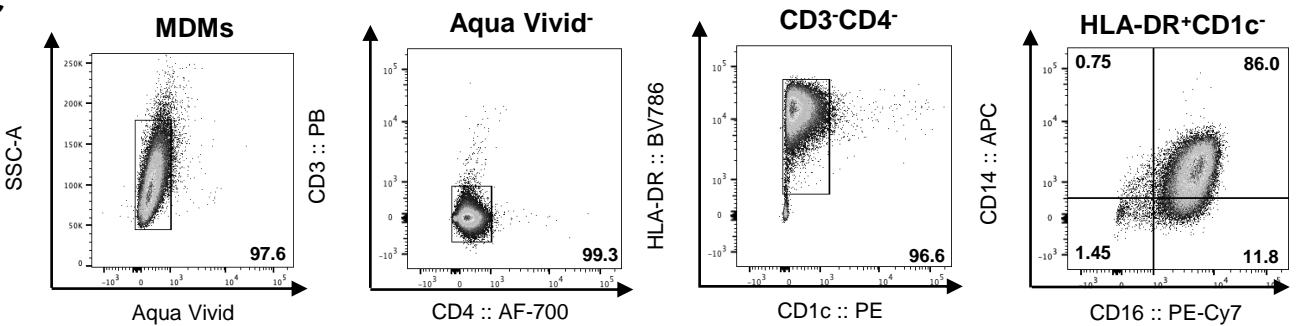

**Supplemental Figure 1 (relative to Figure 1): Phenotyping analysis of monocytes and MDMs.** Monocytes were isolated from PBMCs by negative selection using magnetic beads (Miltenyi). Monocyte-derived macrophages (MDMs) were generated by culturing monocytes in the presence of M-CSF (20 ng/mL) for six days, as depicted in Figure 1A. In each experiment, the cell purity and phenotype were determined by flow cytometry analysis of matched PBMCs (**A**), monocytes (**B**), and MDMs (**C**) upon staining with CD3, CD4, HLA-DR, CD1c, CD14 and CD16 Abs. The viability dye Aqua Vivid was used to exclude dead cells from the analysis. Monocytes and macrophages were identified as cells with a CD3<sup>-</sup>CD4<sup>-</sup>HLA-DR<sup>+</sup>CD1c<sup>-</sup> and CD3<sup>-</sup>CD4<sup>-</sup>HLA-DR<sup>+</sup>CD1c<sup>-</sup>CD14<sup>+</sup>CD16<sup>+</sup> phenotype, respectively. Shown are results generated with cells from one donor representative of results generated with MDMs from 10 HIV-uninfected donors.

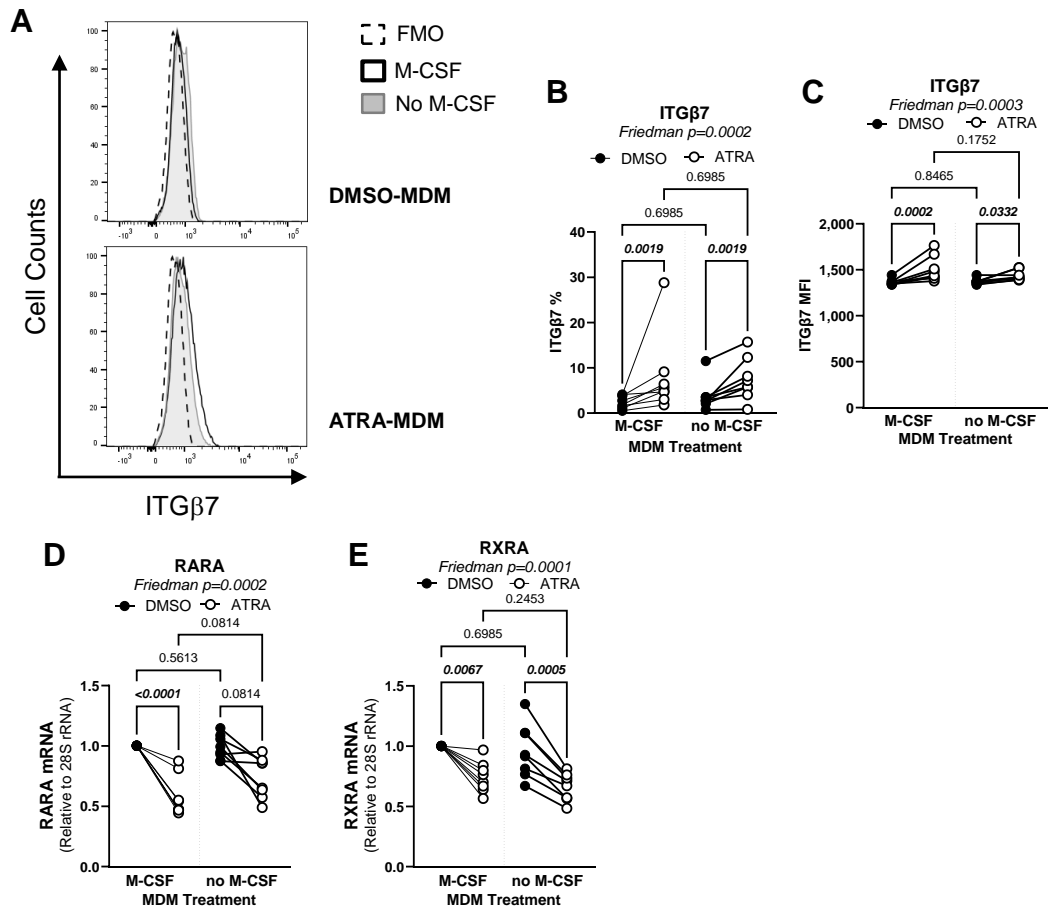

**Supplemental Figure 2 (relative to Figure 1): Effect of ATRA on the expression of ITGB7 protein, and RARA and RXRA mRNA in MDMs treated with ATRA.** Shown are histograms for ITGB7 expression on MDMs pretreated with ATRA and/or M-CSF from one representative participants (**A**) as well as statistical analysis of the frequency of ITGB7<sup>+</sup> MDM (**B**), and ITGB7 MFI (**C**) in ATRA-treated MDM from n=8 participants. Total RNA extracted from MDMs of n=8 HIV-uninfected participants generated in the presence or the absence of M-CSF and or ATRA, as in Figure 3. Shown are levels of RARA (**D**) and RXRA mRNA expression (**E**), as measured by SYBR-Green real-time RT-PCR. Friedman and uncorrected Dunn's Test are indicated on the graphs.

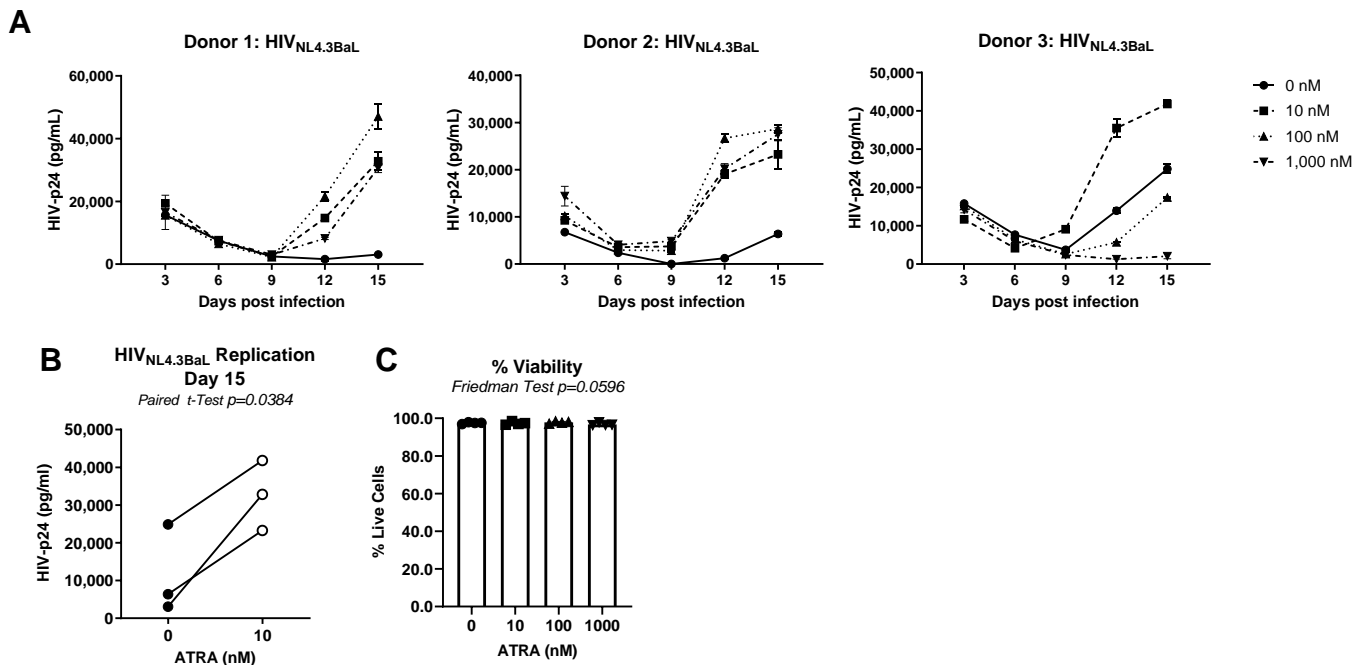

**Supplemental Figure 3 (relative to Figure 1): The dose-effect of ATRA on HIV<sub>NL3.3BaL</sub> replication and viability in MDMs.** MDMs were generated in the presence or the absence of different concentrations of ATRA (10, 100 and 1,000 nM), as depicted in Figure 1A, and were exposed to HIV<sub>NL4.3BaL</sub> (30 ng HIV-p24/well per  $10^6$  MDMs in 300  $\mu$ l media) for 3 hours. Unbound virions were removed by extensive washing. Infected MDMs were cultured in media containing M-CSF (20 ng/mL), in the presence/absence of ATRA at the indicated concentrations. Cell-culture supernatants were collected every 3 days for HIV-p24 ELISA quantification, and fresh media containing M-CSF and/or ATRA was added every 3 days. **(A)** Shown are the kinetics of HIV-1 replication *per donor* at days 3, 6, 9, 12 and 15 post-infection and **(B)** statistical analysis performed at days 15 post-infection with MDMs from  $n=3$  HIV-uninfected donors. **(C)** Cell viability was measured by flow cytometry using the Aqua Vivid viability dye ( $n=4$ ) prior infection. Paired t-Test **(B)** and Friedman and uncorrected Dunn's multiple comparison p-values **(C)** are indicated on the graphs.

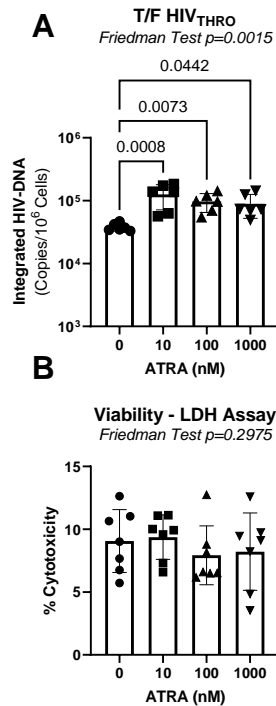

**Supplemental Figure 4 (relative to Figure 1): The dose-effect of ATRA on HIV<sub>THRO</sub> integration and viability in MDMs.** MDMs were generated in the presence or the absence of different concentrations of ATRA (10, 100 and 1,000 nM), as depicted in Figure 1A, and were exposed to HIV<sub>THRO</sub> (5 ng HIV-p24/well per  $10^6$  MDMs in 300  $\mu$ l media) for 3 hours. Unbound virions were removed by extensive washing. Infected MDMs were cultured in media containing M-CSF (20 ng/mL), in the presence/absence of ATRA at the indicated concentrations for 3 days. Shown are levels of integrated HIV-DNA measured by nested real-time PCR at day 3 post-infection (**A**) and cell viability measured by lactate dehydrogenase (LDH) activity assay in cell culture supernatants prior infection (**B**) in cells from  $n=7$  study participants. Friedman and uncorrected Dunn's multiple comparison  $p$ -values are indicated on the graphs.

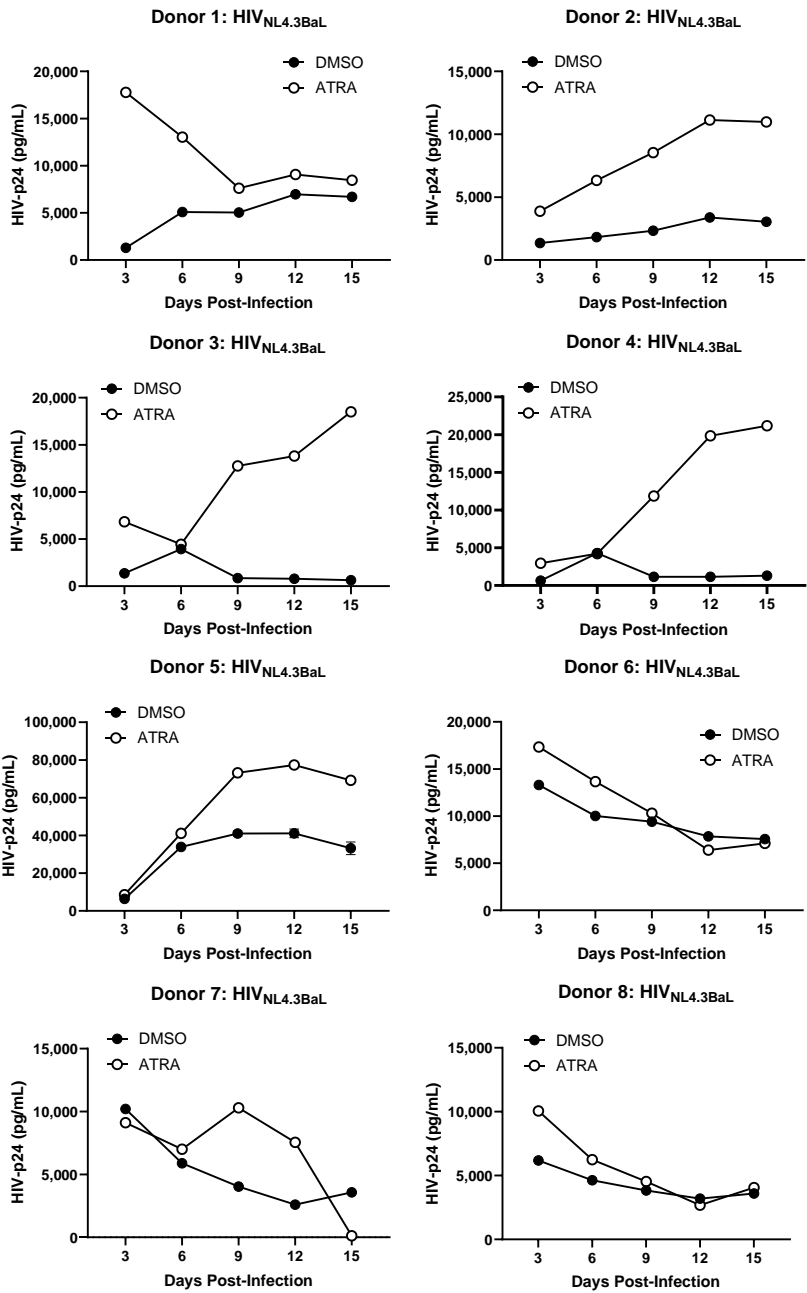

**Supplemental Figure 5: Kinetics of HIV<sub>NL4.3BaL</sub> in ATRA-treated MDM (relative to Figure 1).** MDMs treated or not to ATRA (10 nM) were exposed to HIV<sub>NL4.3BaL</sub> (30 ng HIV-p24/well per 10<sup>6</sup> MDMs in 300  $\mu$ l media) as in Supplemental Figure 2, and cultured in the presence of M-CSF for up to 15 days. Cell-culture supernatants were collected every 3 days for HIV-p24 ELISA quantification, and fresh media containing M-CSF and/or ATRA was added every 3 days. Shown are the kinetics of HIV<sub>NL4.3BaL</sub> replication in MDMs from n=8 different study participants.

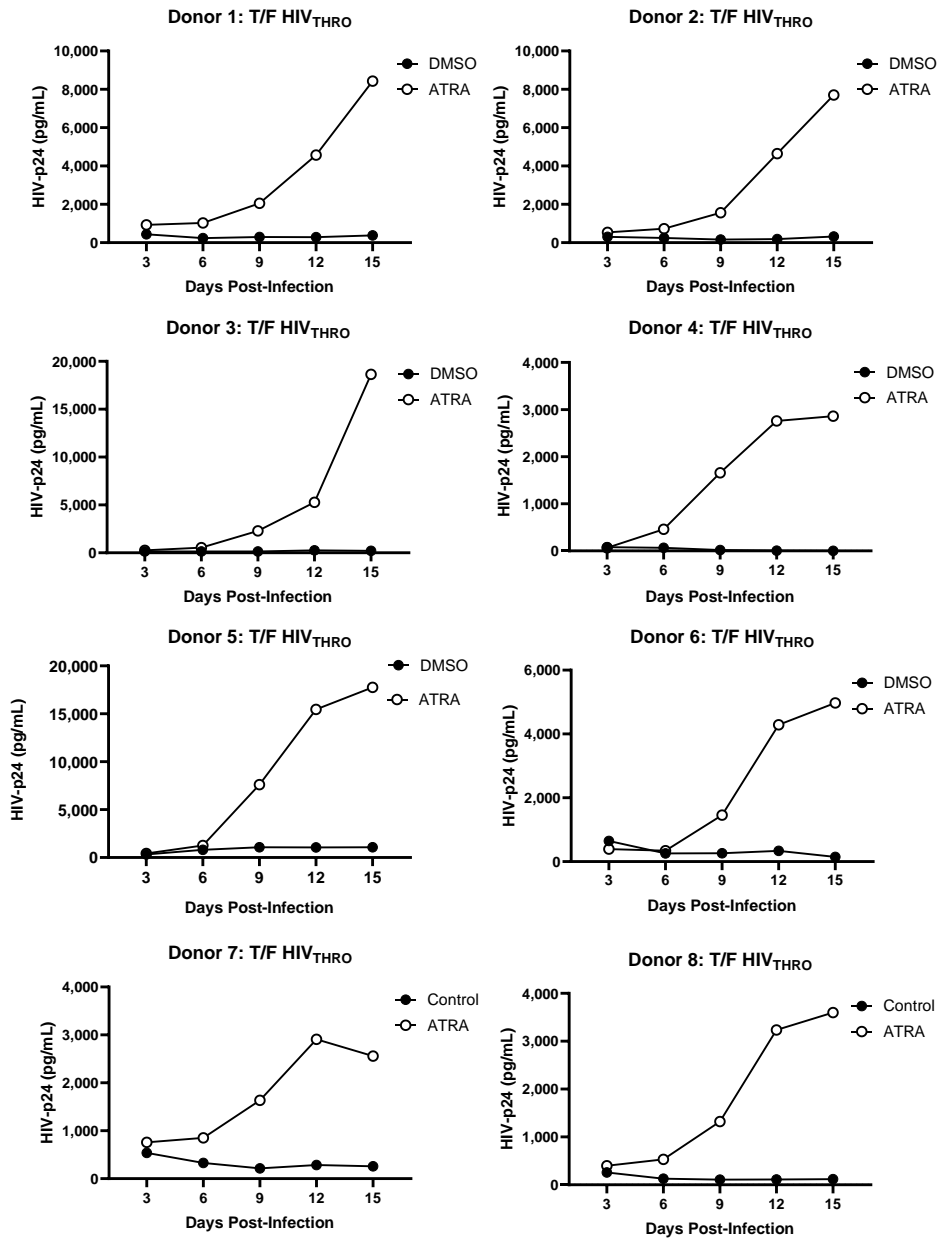

**Supplemental Figure 6 (relative to Figure 1): Kinetics of HIV<sub>THRO</sub> in ATRA-treated MDM.** MDMs treated or not to ATRA (10 nM) were exposed to HIV<sub>THRO</sub> (5 ng HIV-p24/well per 10<sup>6</sup> MDMs in 300  $\mu$ l media) as in Supplemental Figure 2, and cultured in the presence of M-CSF (20 ng/ml) for up to 15 days. Cell-culture supernatants were collected every 3 days for HIV-p24 ELISA quantification, and fresh media containing M-CSF and/or ATRA was added every 3 days. Shown are the kinetics of HIV<sub>THRO</sub> replication in MDMs from n=8 different study participants.

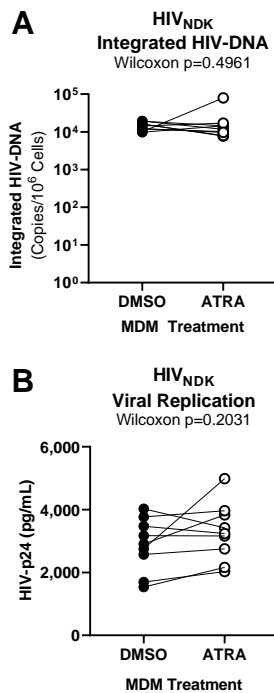

**Supplemental Figure 7 (relative to Figure 1): ATRA does not impact on CXCR4-tropic HIV-1 integration and replication in MDMs.** MDMs generated by culturing monocytes in media containing M-CSF (20 ng/mL), in presence or the absence of ATRA (10 nM), as in Figure 1A, were exposed to the CXCR4-tropic (X4) HIV<sub>NDK</sub> strain (50 ng HIV-p24/10<sup>6</sup> cells in 300  $\mu$ l). Shown are levels of **(A)** integrated HIV-DNA measured by real-time nested PCR and **(B)** HIV-p24 measured by ELISA in cell culture supernatants at day 3 post-infection. Experiments were performed with MDMs from n=8 HIV-uninfected individuals. Wilcoxon test p-values are indicated on the graphs.



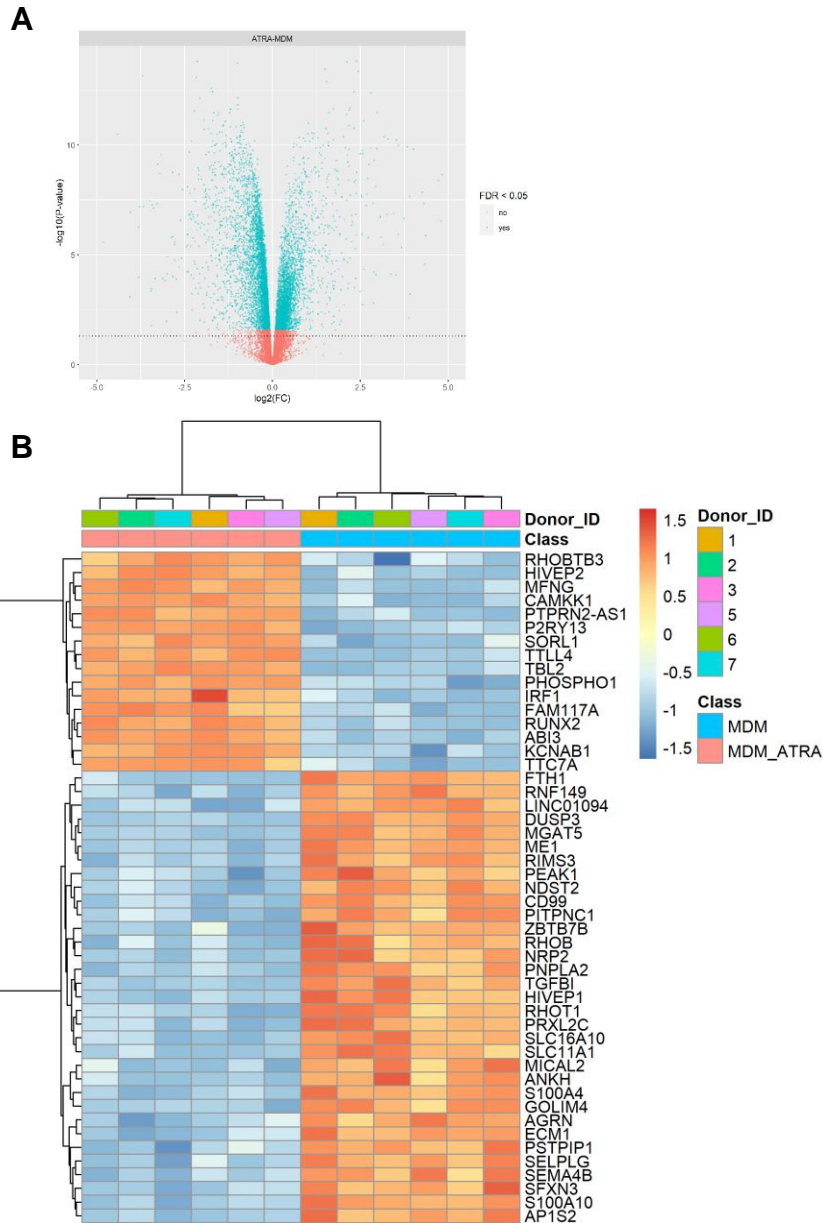

**Supplemental Figure 8 (relative to Figure 4): Identification of genes modulated by ATRA in MDMs.** Total RNA extracted from MDMs generated in the presence (ATRA-MDMs) or the absence (DMSO-MDMs) of ATRA (10 nM) were used for genome-wide RNA sequencing (Illumina technology), as in Figure 3A. **(A)** The volcano plot depicts the log<sub>2</sub> fold change (FC) in gene expression levels (x axis; cut-off: 1.3) and the log<sub>10</sub> p-values for differentially expressed genes (DEG; y axis). **(B)** The heatmap depicts the top 50 upregulated and downregulated DEG in MDMs generated in ATRA-MDMs *versus* DMSO-MDMs. Experiments were performed with MDMs from n=6 HIV-uninfected individuals.

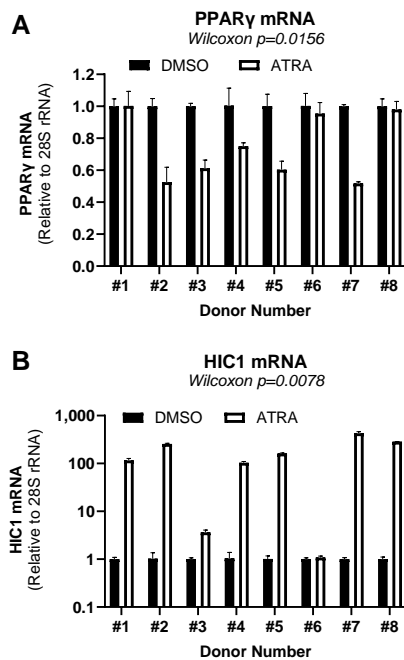

**Supplemental Figure 9 (relative to Figure 4): RT-PCR validation of differential PPAR $\gamma$  and HIC1 mRNA expression in ATRA-MDMs versus DMSO-MDMs.** Total RNA was extracted from MDMs generated in the presence or the absence of ATRA (10 nM), as in Figure 3. Shown are levels of PPAR $\gamma$  (**A**) and HIC1 mRNA expression (**B**), as measured by SYBR-Green real-time RT-PCR. Wilcoxon p-values are indicated on the graphs. Experiments were performed with MDMs from n=8 HIV-uninfected individuals.

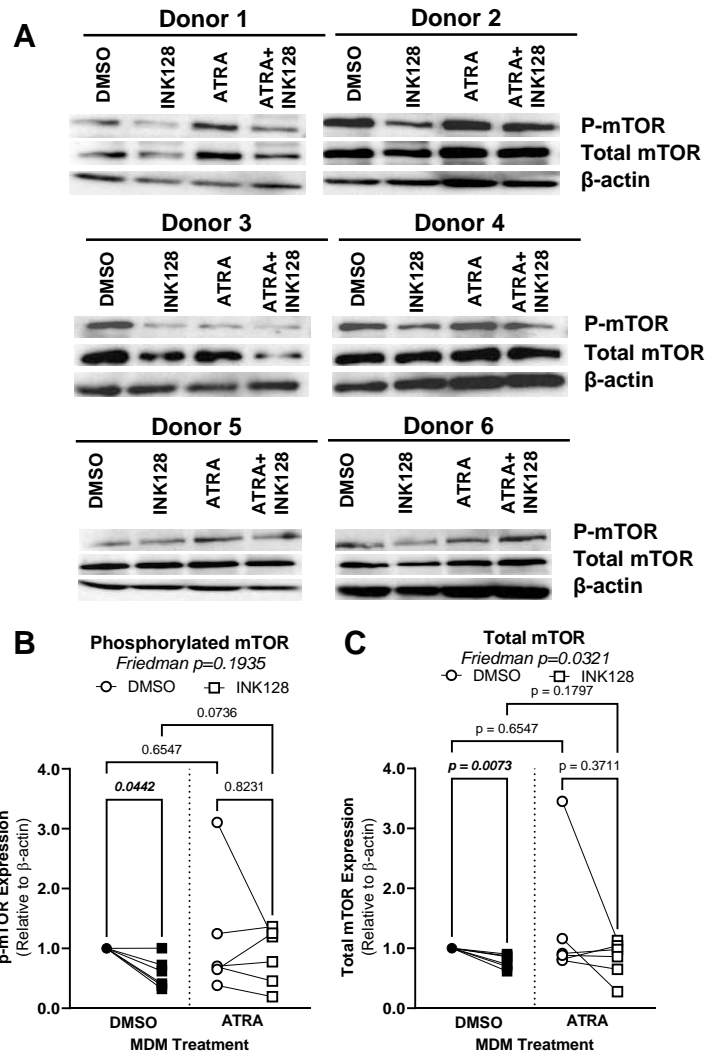

**Supplemental Figure 10 (relative to Figure 5): Effect of ATRA on mTOR expression and phosphorylation.** MDMs were generated in the presence or the absence of ATRA (10 nM; Day -2 until Day 0), as in Figure 1A. Cells harvested at Day 0 prior HIV exposure were used to generate cell lysates that were subject to SDS-gel electrophoresis for the visualisation/quantification of total and phosphorylated/total mTOR expression (**A**). Shown is the visualisation of total mTOR (MW: 289 kDa), phosphorylated mTOR (MW: 289 kDa), and  $\beta$ -actin protein bands (MW: 42 kDa) (**A**) in MDMs from  $n=6$  HIV-uninfected participants, upon incubation with specific Abs. Results in the graphs depict phosphorylated (**left panels**) and total (**right panels**) mTOR (**B**) normalized to  $\beta$ -actin levels ( $n=6$ ). Friedman and uncorrected Dunn's test are indicated on the graphs.

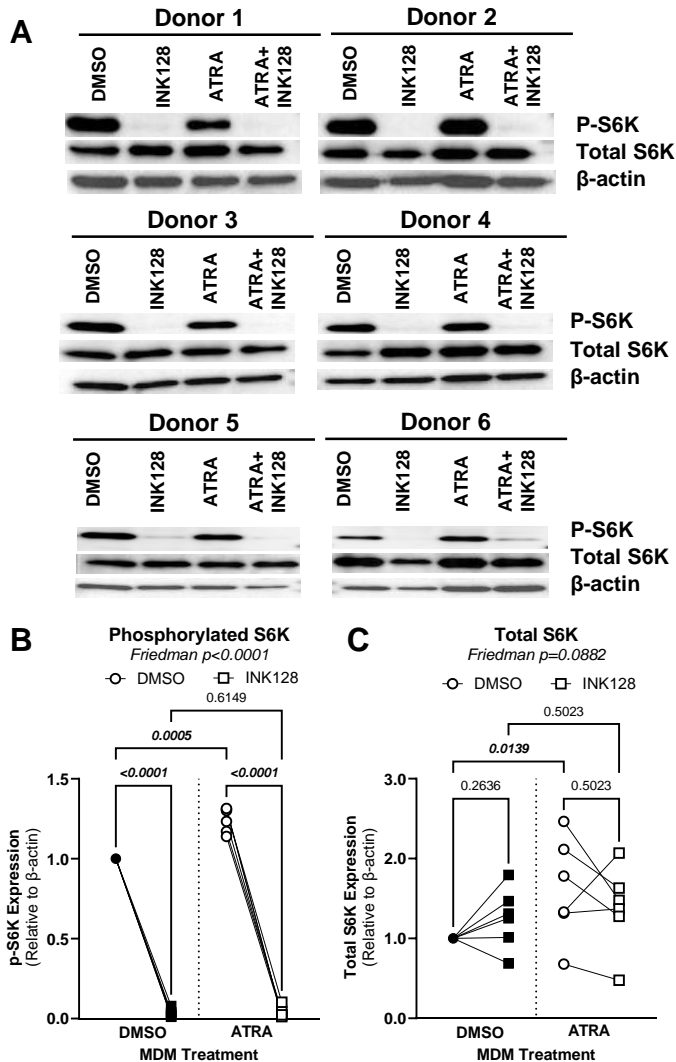

**Supplemental Figure 11 (relative to Figure 5): ATRA increases the expression and the phosphorylation of S6K.** MDMs were generated in the presence or the absence of ATRA (10 nM; Day -2 until Day 0), as in Figure 1A. Cells harvested at Day 0 prior HIV exposure were used to generate cell lysates that were subject to SDS-gel electrophoresis for the visualisation/quantification of total and phosphorylated/total S6K expression (**A**) Shown is the visualisation of total S6K (MW: 32 kDa) and phosphorylated S6K (MW: 32 kDa), and  $\beta$ -actin protein bands (MW: 42 kDa) (**A**) in MDMs from  $n=6$  HIV-uninfected participants, upon incubation with specific Abs. Results in the graphs depict phosphorylated (**left panels**) and total (**right panels**) S6K expression levels (**B**) normalized to  $\beta$ -actin levels ( $n=6$ ). Friedman and uncorrected Dunn's test are indicated on the graphs.

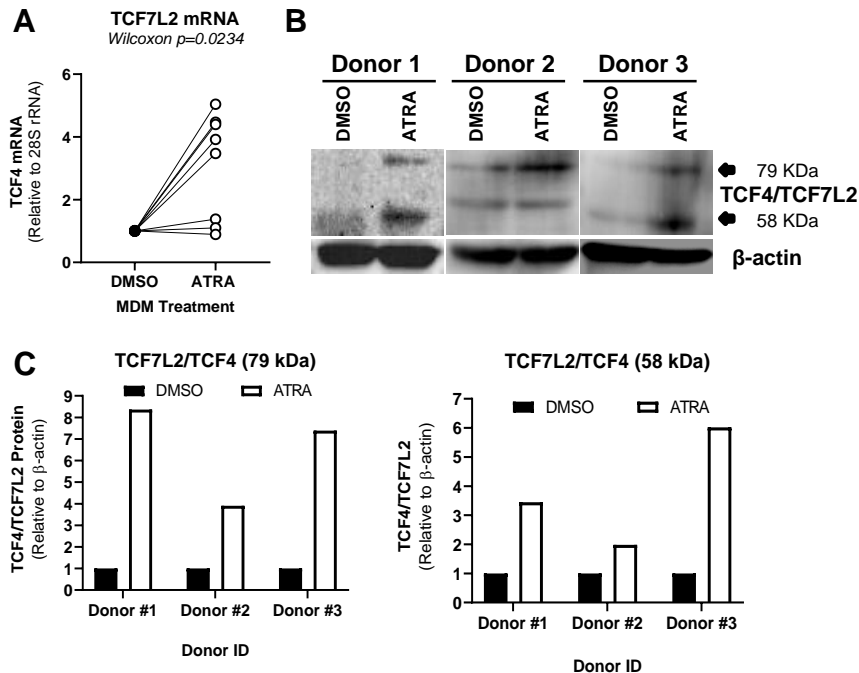

**Supplemental Figure 12 (relative to Figure 4): ATRA modulates the TCF4 mRNA and protein expression.** ATRA-MDMs and DMSO-MDMs obtained as in Figure 3A, were used for the quantification of TCF4 mRNA expression by SYBR-Green RT-PCR (**A**), as well as the visualisation/quantification of TCF4 protein expression by western blotting (**B-C**). Shown are statistical analysis of TCF4 mRNA expression in MDMs from n=8 HIV-uninfected donors (**A**). Also, shown are TCF4 (MW: 79 KDa and 58 KDa) and  $\beta$ -actin (MW: 42 KDa) protein expression in MDMs (**B**) and relative expression of the two TCF4 bands (79 KDa, left panel; 58 KDa right panel) relative to  $\beta$ -actin (**C**) in MDMs from n=3 HIV-negative donors.

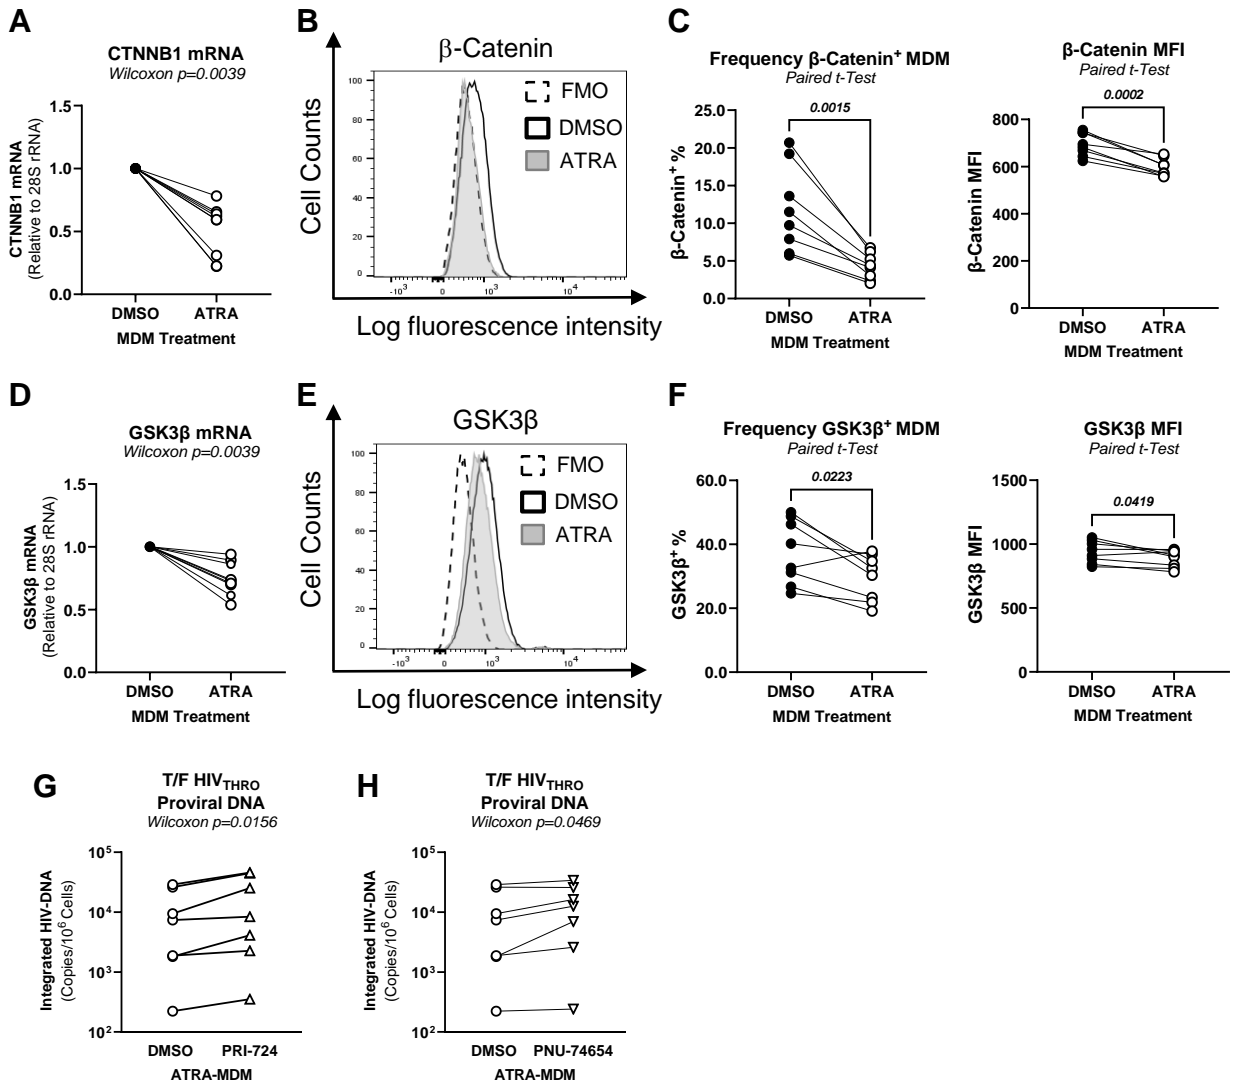

**Supplemental Figure 13 (relative to Figure 4): ATRA modulates the expression of  $\beta$ -Catenin and GSK3 $\beta$  in MDMs.** MDMs were generated in the presence/absence of ATRA as in Figure 1A and exposed to PRI-724 (0.1 $\mu$ M) or PNU-74654 (10  $\mu$ M) two days before infection and the day of infection. Briefly, MDMs harvested prior HIV-1 infection were used for the analysis of  $\beta$ -Catenin (A-C) and GSK3 $\beta$  (D-F) mRNA expression by RT-PCR (A and D) and intranuclear protein expression by flow cytometry (B-C and E-F) ( $n=8$ ) (A and D) Shown is the ATRA-mediated decrease in  $\beta$ -Catenin (A) and GSK3 $\beta$  (D) mRNA levels in MDMs from  $n=8$  participants. (B-C and E-F) Shown are flow cytometry histograms for  $\beta$ -Catenin and GSK3 $\beta$  expression on MDM generated in the presence/absence of ATRA from one representative participants (B, E), as well as statistical analysis of the  $\beta$ -Catenin (C) and GSK3 $\beta$  (F) expression, in terms of % (left panels) and MFI (right panels) in MDMs from  $n=8$  participants. MDM generated in the presence of ATRA were exposed to PRI-724 (G) and PNU-74654 (H) T/F HIV<sub>THRO</sub> to quantify HIV-DNA integration by nested real-time PCR at day 3 post-infection. Shown are statistical analysis performed with results generated from  $n=7$  participants. Wilcoxon values are indicated on the graphs.

**Supplemental Table 1: Primers and probes used for PCR and RT-PCR. Related to STAR**

| Identification               | Sequence                                                       | Provider    | Identifier |
|------------------------------|----------------------------------------------------------------|-------------|------------|
| Primer AA55                  | 5'-CGT CTA GAG ATT TTC CAC AC-3'                               | IDT         | N/A        |
| Primer M667                  | 5'-CTA ACT AGG GAA CCC ACT G-3'                                | IDT         | N/A        |
| CD3 external primer 1        | 5'-ACT GAC ATG GAA CAG GGG AAG-3'                              | IDT         | N/A        |
| CD3 external primer 2        | 5'- CCA GCT CTG AAG TAG GGA ACA TAT-3'                         | IDT         | N/A        |
| Primer GagR                  | 5'- AGC TCC CTG CTT GCC CAT A-3'                               | IDT         | N/A        |
| Primer Alu1                  | 5'- TCC CAG CTA CTG GGG AGG CTG AGG-3'                         | IDT         | N/A        |
| Primer Alu2                  | 5'- GCC TCC CAA AGT GCT GGG ATT ACA G-3'                       | IDT         | N/A        |
| Primer LM667                 | 5'- ATG CCA CGT AAG CGA AAC TCT GGC TAA CTA GGG AAC CCA CTG-3' | IDT         | N/A        |
| Primer LambdaT               | 5'- ATG CCA CGT AAG CGA AAC T-3'                               | IDT         | N/A        |
| Primer AA55M                 | 5'- GCT AGA GAT TTT CCA CAC TGA CTA A-3'                       | IDT         | N/A        |
| Primer SK30                  | 5'- GGT CTG AGG GAT CTC TAG-3'                                 | IDT         | N/A        |
| Primer SK29                  | 5'- ACT AGG GAA CCC ACT GCT-3'                                 | IDT         | N/A        |
| CD3 internal primer 1        | 5'- CCT CTC TTC AGC CAT TTA AGT A-3'                           | IDT         | N/A        |
| CD3 internal primer 2        | 5'- GGC TAT CAT TCT TCT TCA AGG T-3'                           | IDT         | N/A        |
| Probe LTR-LC                 | 5'-LC640-<br>CACTCAAGGCAAGCTTTATTGAGGC-3'-phosphate            | TIB MolBiol | N/A        |
| Probe LTR-FL                 | 5'-<br>CACAACAGACGGGCACACACTACTTGA-3'-Fluorescein              | TIB MolBiol | N/A        |
| Probe P1                     | 5'-<br>GGCTGAAGGTTAGGGATACCAATATTCTGTCTC-3'-Fluorescein        | TIB MolBiol | N/A        |
| Probe P2                     | 5'-LC640-<br>CTAGTGATGGGCTCTTCCCTTGAGCCCTTC-3'-phosphate       | TIB MolBiol | N/A        |
| Primer 28S Forward           | 5'-CGAGATTCCTGTCCCCACTA-3'                                     | IDT         | N/A        |
| Primer 28S Reverse           | 5'-GGGGCCACCTCCTTATTCTA-3'                                     | IDT         | N/A        |
| Unspliced HIV-1 mRNA Forward | 5'- TTCTTCAGAGCAGACCAGAGC-3'                                   | IDT         | N/A        |
| Unspliced HIV-1 mRNA Reverse | 5'- GCTGCCAAAGAGTGATCTGA-3'                                    | IDT         | N/A        |
| GAPDH Forward                | 5'-GGACCTGACCTGCCGTCTAGAA-3'                                   | IDT         | N/A        |
| GAPDH Reverse                | 5'- GGTGTCGCTGTTGAAGTCAGAG-3'                                  | IDT         | N/A        |
| YWHAZ Forward                | 5'- ACTTTTGGTACATTGTGGCTTCAA-3'                                | IDT         | N/A        |
| YWHAZ Reverse                | 5'- CCGCCAGGACAAACCAGTAT-3'                                    | IDT         | N/A        |
| 5' LTR Nuc-1 region Forward  | 5'-TGTGTGCCCGTCTGTTGTGTGA-3'                                   | IDT         | N/A        |
| 5' LTR Nuc-1 region Reverse  | 5'-TCGGGCGCCACTGCTAGAGA-3'                                     | IDT         | N/A        |

N.A, information not available; N/A, Not applicable
